# Supplementary material for: Geomorphic imprint of high-mountain floods: insights from the 2022 hydrological extreme across the upper Indus River catchment in the northwestern Himalayas
Source: Copernicus journal article supplement (doi:10.5194/esurf-13-147-2025), 2025-02-07
Supplement: Supplementary file 1 [file esurf-13-147-2025-supplement.pdf]

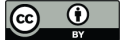

*Supplement of*

**Geomorphic imprint of high-mountain floods: insights from the 2022 hydrological extreme across the upper Indus River catchment in the northwestern Himalayas**

**Abhishek Kashyap et al.**

*Correspondence to:* Mukunda Dev Behera ([mdbehera@coral.iitkgp.ac.in](mailto:mdbehera@coral.iitkgp.ac.in))

The copyright of individual parts of the supplement might differ from the article licence.

## Supplementary Figures:

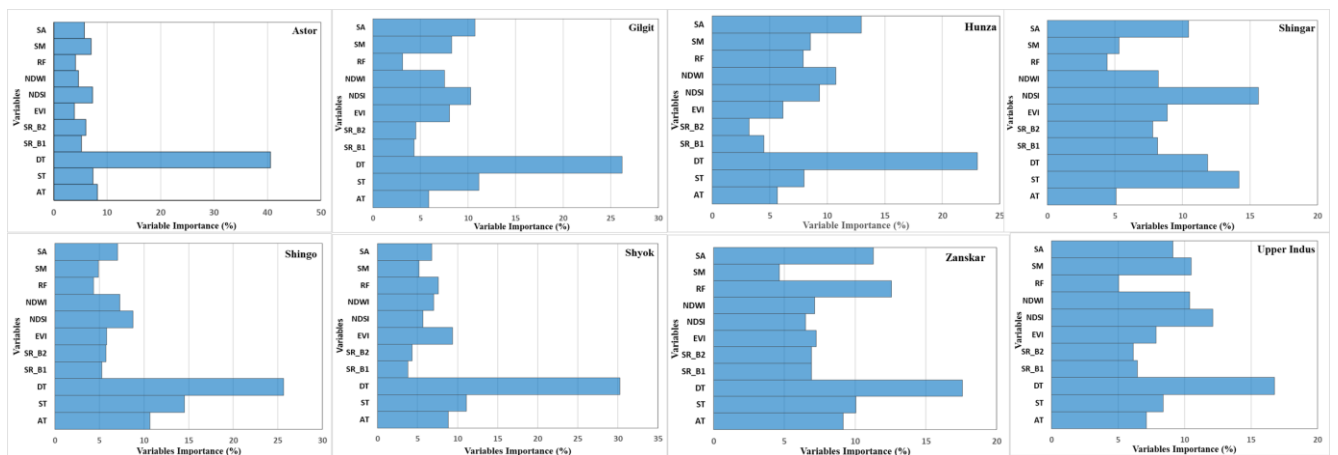

Fig.S1. Random Forest-Regression based variables importance for quantifying anomalous precipitation from July 1 to August 31, 2022 across Upper Indus catchment as well as along all the major tributaries:

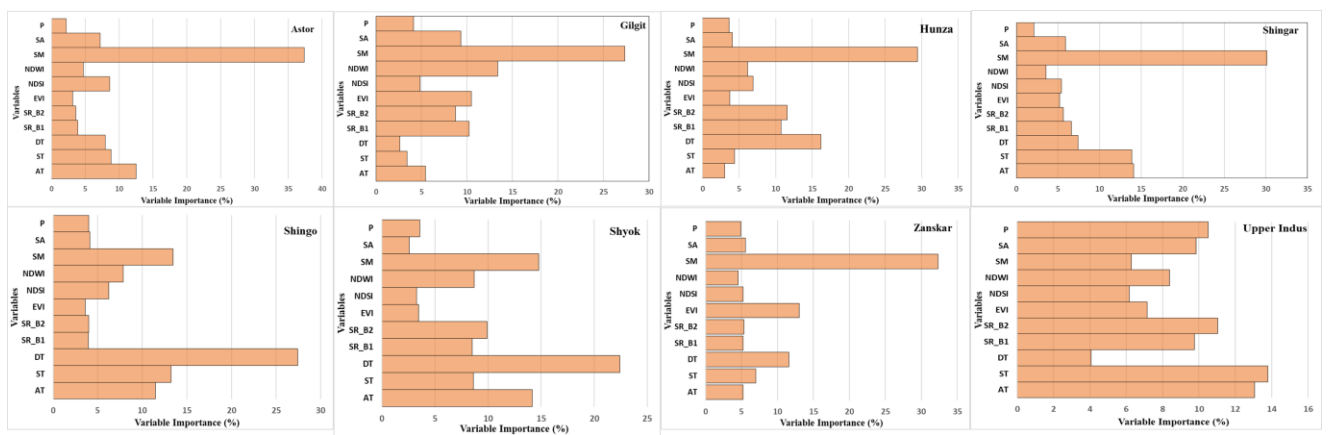

Fig.S2. Random Forest-Regression based variables importance for quantifying anomalous runoff from July 1 to August 31, 2022 across Upper Indus catchment as well as along all the major tributaries:

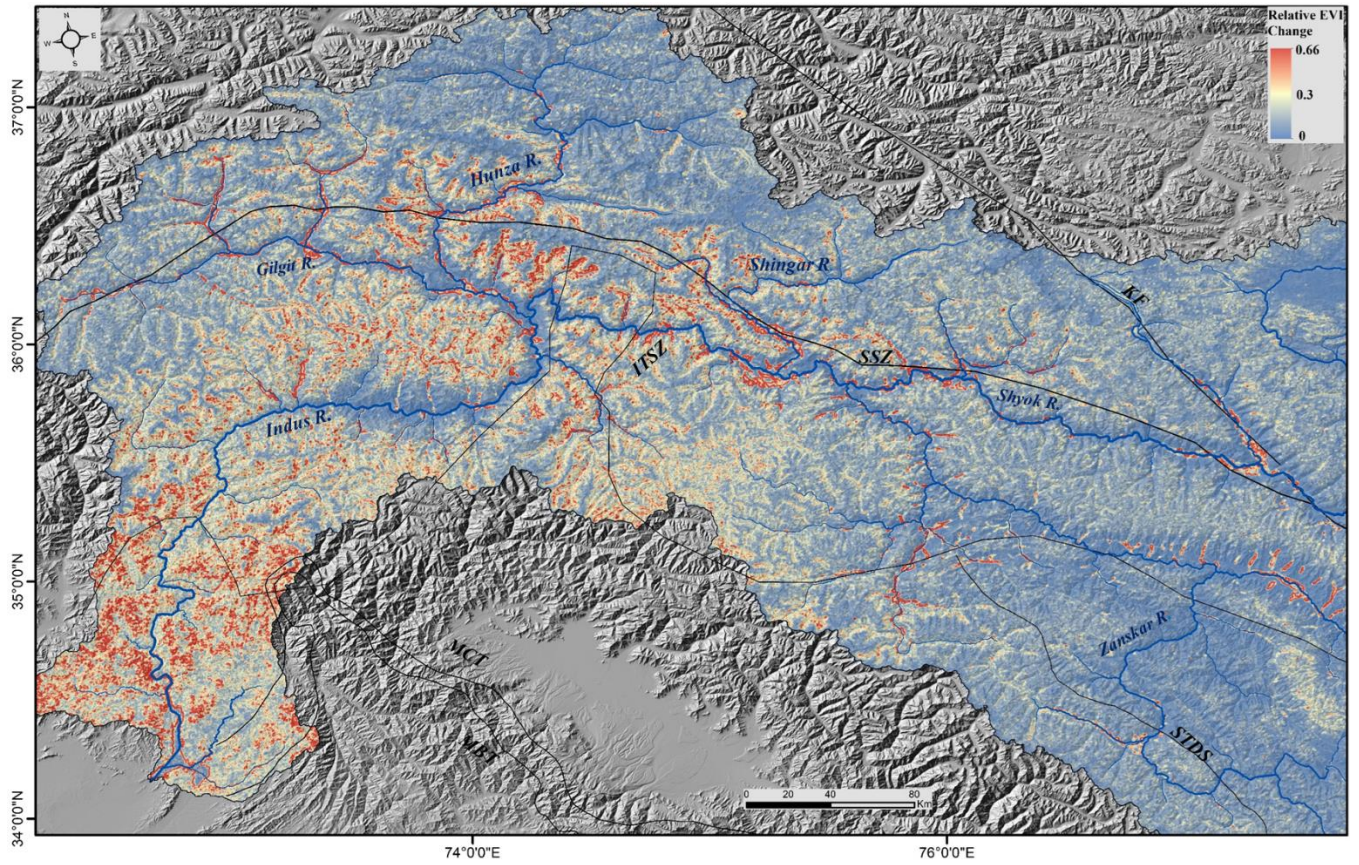

Fig. S3. The spatial map of Relative EVI derived from Landsat-8 (We used mean composite datasets from July 1 to August 31, 2022, and subtracted them from previous 5-year composite datasets of the July-August period to estimate the relative difference).

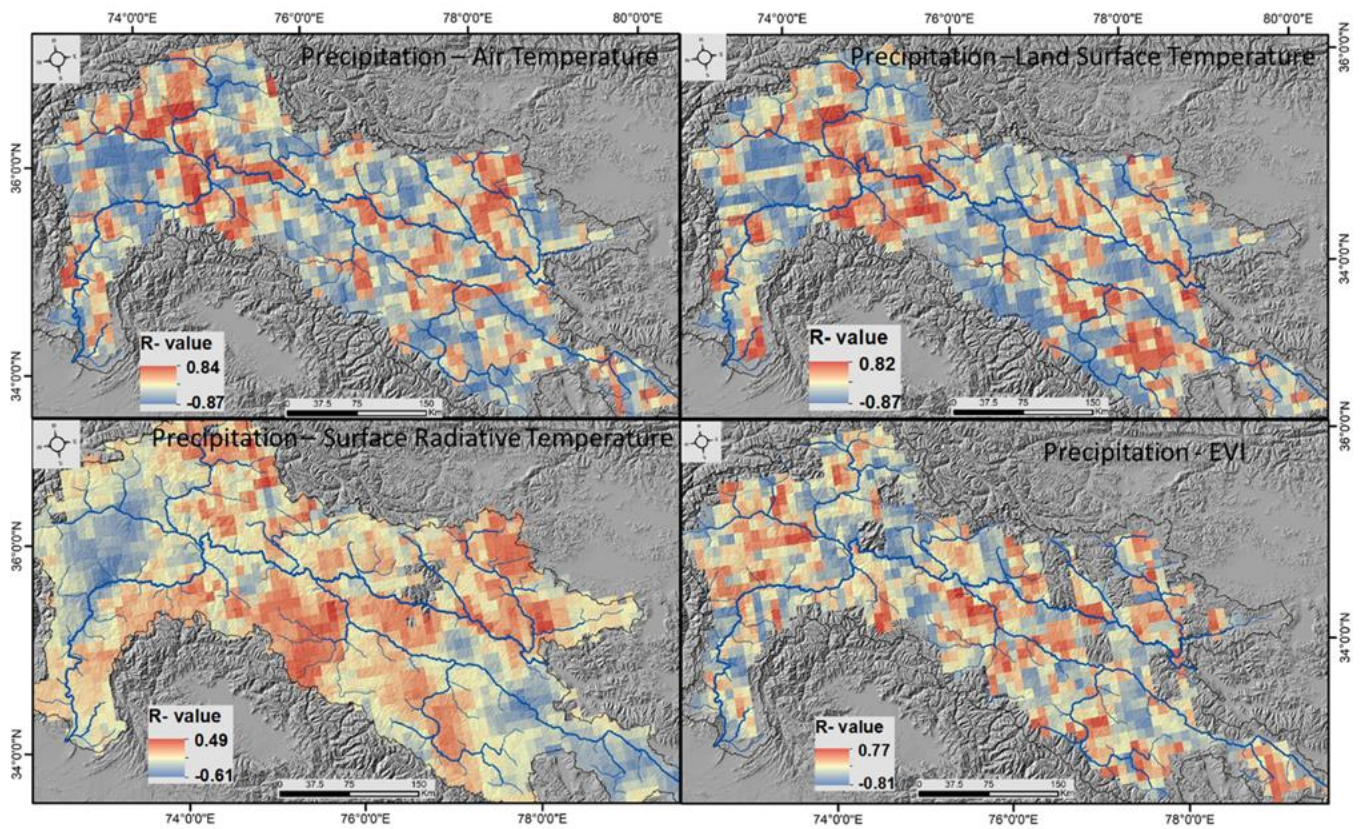

Fig. S4. The spatial correlation map between event characteristics such as Precipitation anomalies with (a) Air-Temperature (b) Land surface temperature (c) Surface radiative temperature (d) relative EVI; across Upper Indus catchment.

**Performance metrics of Random Forest Regression model:**

| Catchments  | MAE (%) | MSE (%) | RMSE (%) | R-squared |
|-------------|---------|---------|----------|-----------|
| Astor       | 47.26   | 63.43   | 52.14    | 0.0093    |
| Gilgit      | 53.78   | 67.42   | 56.82    | 0.00324   |
| Hunza       | 61.84   | 77.83   | 68.74    | 0.0026    |
| Shingar     | 42.32   | 64.25   | 47.32    | 0.01562   |
| Shingo      | 49.85   | 71.22   | 54.22    | 0.05429   |
| Shyok       | 37.68   | 49.84   | 41.23    | 0.1782    |
| Upper Indus | 31.24   | 42.2    | 32.42    | 0.1243    |
| Zanskar     | 29.41   | 39.46   | 31.57    | 0.2143    |

Table S1. Random Forest based Regression Performance Metrics (For Precipitation estimation).

| Catchments  | MAE (%) | MSE (%) | RMSE (%) | R-squared |
|-------------|---------|---------|----------|-----------|
| Astor       | 37.41   | 43.19   | 39.24    | 0.01549   |
| Gilgit      | 27.62   | 37.84   | 28.62    | 0.02846   |
| Hunza       | 33.54   | 41.854  | 34.621   | 0.05624   |
| Shingar     | 21.654  | 29.5436 | 22.4863  | 0.1864    |
| Shingo      | 17.864  | 24.894  | 19.2432  | 0.19435   |
| Shyok       | 43.6524 | 63.9476 | 49.3278  | 0.005327  |
| Upper Indus | 39.5384 | 51.6493 | 44.6524  | 0.006348  |
| Zanskar     | 14.6354 | 19.5439 | 15.01945 | 0.1349    |

Table S2. Random Forest based Regression Performance Metrics (For Discharge estimation).
